# Supplementary material for: Changes in the patterns of respiratory support and incidence of bronchopulmonary dysplasia; a single center experience
Source: PubMed Central journal article supplement (PMC10339611; doi:10.1186/s12887-023-04176-x), 2023-07-13
Supplement: 12887_2023_4176_MOESM1_ESM.pdf [file 12887_2023_4176_MOESM1_ESM.pdf]

1 **Supplementary**

2 The infants who received HHHFNC were divided into two groups according to the median number of days  
3 which is 13. There are now two groups: group 1 receiving HHHFNC for 13 days or less and group 2 receiving  
4 HHHFNC for more than 13 days. The main outcome comparisons according to BPD and its severity grade  
5 were conducted between these groups as shown in the table below.

6 Supplementary Table 1: The BPD incidence rate and its severity grade according to receiving HHHFNC for 13 days.

|                               | Infants receiving<br>HHHFNC for 13 days or<br>less<br>(n=122) | Infants receiving<br>HHHFNC for more than<br>13 days<br>(n=119) | P value |
|-------------------------------|---------------------------------------------------------------|-----------------------------------------------------------------|---------|
| Overall BPD incidence<br>rate | 49 (40)                                                       | 77 (65)                                                         | <0.01   |
|                               |                                                               |                                                                 |         |
| BPD grade 1                   | 30 (25)                                                       | 53 (44.5)                                                       | <0.01   |
| BPD grade 2                   | 14 (11.5)                                                     | 15 (13)                                                         | 0.79    |
| BPD grade 3                   | 5 (4)                                                         | 9 (7.5)                                                         | 0.25    |

7 Statistical comparison conducted using chi square test. Data presented as number (percentage). HHHFNC: heated humidified high  
8 flow nasal cannula, BPD: Bronchopulmonary dysplasia

9
